# Supplementary material
Source: publisher site journal article supplement (https://www.dovepress.com/article/396537)

Supplementary Figure 1: Sample raw and pre-preprocessed images, used by the “ensemble structure” for training of the AREDS 5-step Simplified Severity Scale CNN


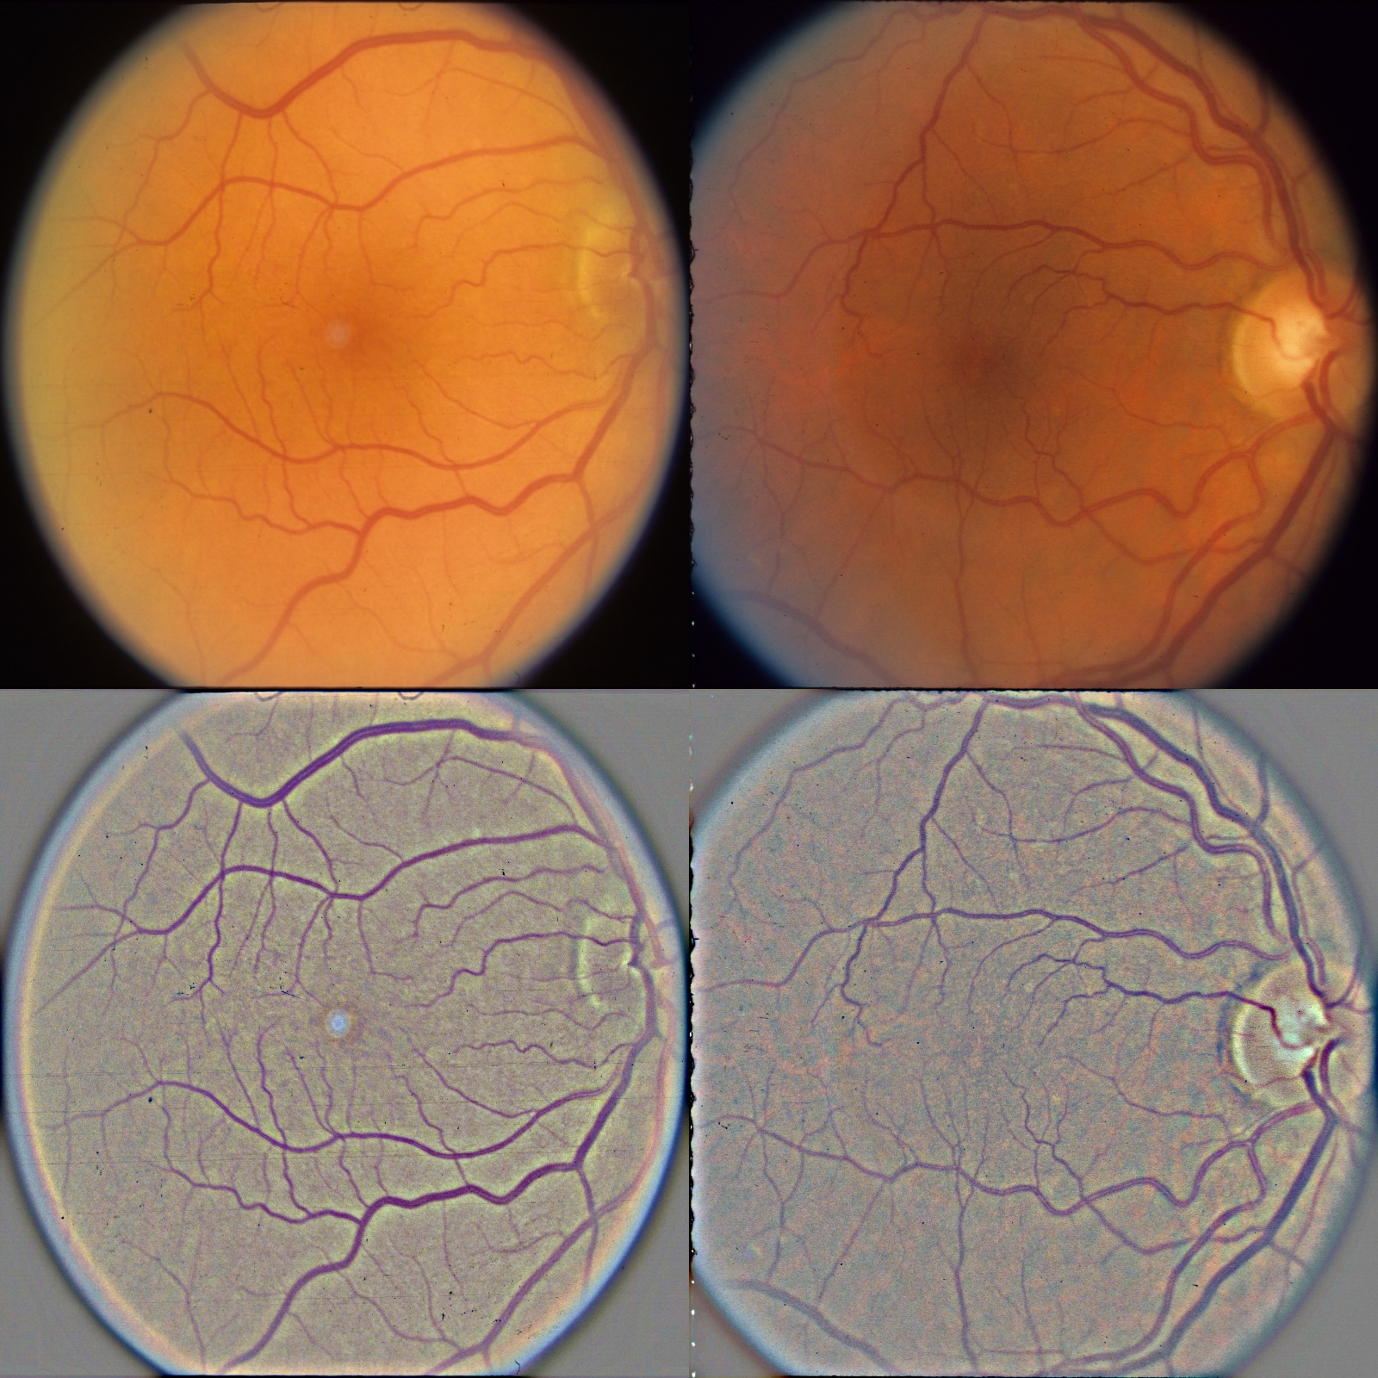


Supplementary Figure 2: the detailed “ensemble structure” of the CNN design- used to assess the AREDS 5-step Simplified Severity Scale


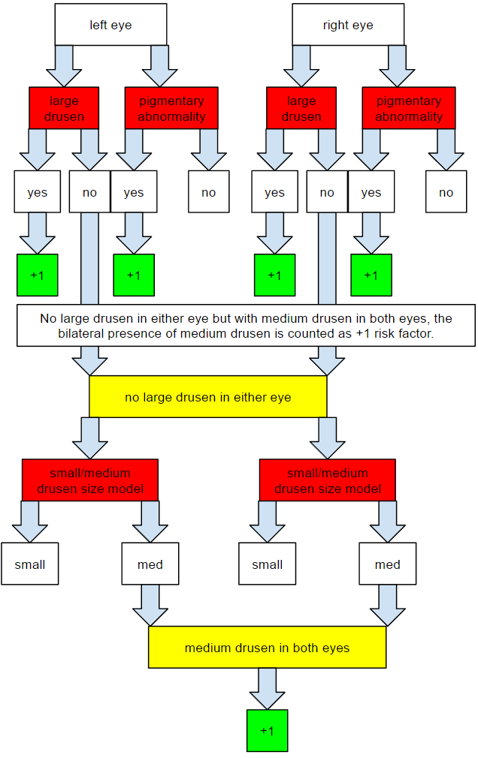

Supplement: Supplementary file 1 [file get_supplementary_file.php]
